1 Metabolomic profiling identifies complex lipid species associated with response to weight loss  
2 interventions

3

4 Nathan A. Bihlmeyer<sup>1</sup>, Lydia Coulter Kwee<sup>1</sup>, Clary B. Clish<sup>2</sup>, Amy Anderson Deik<sup>2</sup>, Robert E.

5 Gerszten<sup>3</sup>, Neha J. Pagidipati<sup>4</sup>, Blandine Laferrère<sup>5</sup>, Laura P. Svetkey<sup>6</sup>, Christopher B.

6 Newgard<sup>1</sup>, William E. Kraus<sup>1</sup>, Svati H. Shah<sup>1</sup>

7 1. Duke Molecular Physiology Institute, Duke University, Durham, NC 27701, USA

8 2. Metabolomics Platform, Broad Institute of MIT and Harvard, Cambridge, MA 02142, USA

9 3. Division of Cardiovascular Medicine, Beth Israel Deaconess Medical Center, Harvard

10 Medical School, Boston, MA 02215, USA

11 4. Duke Clinical Research Institute, Duke University, Durham, NC 27701, USA

12 5. Columbia University Irving Medical Center, New York, NY 10032, USA

13 6. Department of Medicine, Duke University Medical Center, Durham, NC 27710, USA

14

15 **Corresponding author**

16 Svati H. Shah, MD

17 Duke Molecular Physiology Institute

18 300 N Duke St, Box 104775, Durham, NC 27701

19 [svati.shah@duke.edu](mailto:svati.shah@duke.edu)

20

## 21 Abstract

22 Obesity is an epidemic internationally. While weight loss interventions are efficacious, they are  
23 compounded by heterogeneity with regards to clinically relevant metabolic responses. Thus, we  
24 sought to identify metabolic pathways and biomarkers that distinguish individuals with obesity  
25 who would most benefit from a given type of intervention. Liquid chromatography mass  
26 spectrometry-based profiling was used to measure 765 metabolites in baseline plasma from  
27 three different weight loss studies: WLM (behavioral intervention, N=443), STRRIDE-PD  
28 (exercise trial, N=163), and CBD (surgical cohort, N=125). The primary outcome was percent  
29 change in insulin resistance (as measured by the Homeostatic Model Assessment of Insulin  
30 Resistance [% $\Delta$ HOMA-IR]) over the intervention. Overall, 92 individual metabolites were  
31 associated with % $\Delta$ HOMA-IR after adjustment for multiple comparisons. Concordantly, the most  
32 significant metabolites were triacylglycerols (TAGs;  $p=2.3e-5$ ) and diacylglycerols (DAGs;  
33  $p=1.6e-4$ ), with higher TAG and DAG levels associated with a greater improvement in HOMA-  
34 IR. In tests of heterogeneity, 50 metabolites changed differently between weight loss  
35 interventions; we found amino acids, peptides, and their analogues to be most significant ( $4.7e-$   
36  $3$ ) in this category. Our results highlight novel metabolic pathways associated with heterogeneity  
37 in response to weight loss interventions, and related biomarkers which could be used in future  
38 studies of personalized approaches to weight loss interventions.

## 39 Introduction

40 Obesity is a major epidemic in the developed world and is an increasing problem in developing  
41 countries, with a range of consequences including dyslipidemia, hypertension, cardiovascular  
42 disease (CVD), stroke, type 2 diabetes mellitus (T2DM), and overall mortality.[1–4] In the United  
43 States, one third of adults are obese and approximately 300,000 deaths are attributed to obesity  
44 every year.[5,6] Behavioral, pharmacologic, exercise, dietary, and surgical intervention methods  
45 have been attempted to curb the obesity epidemic. Ideally, these interventions would be  
46 effective in all adults equally; however even when accounting for the amount of weight loss,  
47 individuals show heterogeneity in improvement in obesity-related co-morbidities and CVD risk  
48 factors.[7] Further, compliance with obesity intervention protocols is low unless expensive and  
49 protracted intervention programs run by a trained interventionist are employed. Surgical obesity  
50 interventions can partially overcome compliance issues; however, these are costly, can have  
51 short- and long-term complications, and are characterized by frequent weight regain. In  
52 recognition of these issues, the American Heart Association (AHA), the American College of  
53 Cardiology (ACC), and The Obesity Society (TOS) released a call for researchers to focus on  
54 determining the “the best approach to identify and engage those who can benefit from weight  
55 loss”.[8]

56  
57 Blood-based biomarkers, by serving as more granular snapshots into an individual’s unique  
58 biochemistry, could distinguish individuals who would benefit the most from surgical  
59 interventions from those who can benefit from lower cost, less-invasive solutions. Our previous  
60 work has demonstrated a clear disconnect between amount of weight loss during lifestyle  
61 obesity interventions and improvement in insulin resistance[9], as well as marked inter-individual  
62 heterogeneity in amount of weight loss and metabolic responses to a given weight loss  
63 intervention. In this study, we investigate an omics-driven personalized approaches to

64 understanding the molecular mechanisms of obesity and identifying biomarkers of response  
65 among diverse weight loss interventions including behavioral, exercise and surgical  
66 interventions.

67

68

## 69 **Methods**

70 **Study Populations and Study approval.** The **WLM** cohort has been described previously[10]  
71 (NCT00054925); all participants provided written consent. Approval from the Duke University  
72 Institutional Review Board was given. Notably, overweight or obese adults with hypertension,  
73 dyslipidemia, or both were recruited from clinical research centers at Duke University, Johns  
74 Hopkins University, Pennington Biomedical Research Center, or the Kaiser Permanente Center  
75 for Health Research between 2003 and 2009. This study only involves samples collected during  
76 phase 1 of the WLM intervention in which all participants were involved in a group-based  
77 behavioral intervention. A trained interventionist led 20 weekly group sessions with the goals for  
78 participants to reach 180 minutes per week of moderate physical activity (e.g., walking), reduce  
79 caloric intake, adopt the Dietary Approaches to Stop Hypertension (DASH) dietary pattern, and  
80 lose approximately ~0.5-1 kg per week. DASH was chosen because it reduces CVD risk  
81 factors.[11–16] Only participants who lost at least 4 kg during the 6-month weight loss program  
82 were considered for this study. Relevant for this study, blood plasma was drawn at baseline and  
83 6-month follow-up, which we used for non-targeted metabolomics.

84

85 The **STRIDE-PD** study[17,18] (NCT00962962) compared three 6-month exercise-only groups  
86 between 2009 and 2013; differing in amount or intensity to a fourth lifestyle intervention group:  
87 diet plus exercise similar to the first 6-months of the Diabetes Prevention Program (DPP). All  
88 participants in STRIDE-PD provided written consent and approval from the Duke University  
89 Institutional Review Board was given. Sedentary, moderately overweight/obese ( $25 < \text{BMI} < 35$   
90  $\text{kg/m}^2$ ), nonsmoking adults between the ages of 45 and 75 years with prediabetes, but no  
91 history of diabetes mellitus (T2DM) or CVD, were randomly assigned to one of four groups. The  
92 STRIDE-PD study defined prediabetes as high-normal to impaired fasting glucose (95-125  
93 mg/dL). The four groups were: 1) low-amount/moderate-intensity exercise; 2) high-

94 amount/moderate-intensity exercise; 3) high-amount/vigorous-intensity exercise; 4) diet and  
95 exercise clinical lifestyle intervention. Relevant for this study, the blood plasma which we used  
96 for non-targeted metabolomics was drawn at baseline and 6-month follow-up.

97

98 The **CBD** cohort was a surgical weight loss cohort of individuals who underwent either Roux-en-  
99 Y gastric bypass surgery (RYGB) or adjustable gastric banding surgery (AGB) at St Luke's  
100 Roosevelt Hospital Center between 2006 and 2014. All participants signed a consent form prior  
101 to engaging in various research studies aiming to identify changes in gut hormones and  
102 metabolism after bariatric surgery (NCT01516320, NCT02287285, NCT02929212,  
103 NCT00571220) [19–23]. Approval from the Columbia University Institutional Review Board was  
104 given. As such, each participant had fasting blood plasma drawn at baseline, with body weight  
105 and HOMA-IR measured at multiple follow-up visits up to a year.

106

107 **Metabolomic profiling.** Four complementary liquid chromatography tandem mass  
108 spectrometry (LC-MS)-based methods were used to measure plasma lipids and polar  
109 metabolites as previously described [24–28]. The methods are characterized by the  
110 chromatography stationary phase and MS ionization mode used and are referred to as C8-pos,  
111 C18-neg, HILIC-pos, and HILIC-neg. The C8-pos, C18-neg, and HILIC-pos methods were  
112 configured on LC-MS systems comprised of Nexera X2 U-HPLCs (Shimadzu) coupled to Q  
113 Exactive series orbitrap mass spectrometers (Thermo Fisher Scientific) for high resolution  
114 accurate mass (HRAM) profiling of both hundreds of identified metabolites and thousands of  
115 unknowns, while the HILIC-neg method was operated on both a Nexera X2-Q Exactive system  
116 for HRAM profiling and a UPLC (Waters) coupled to a QTRAP 5500 (SCIEX) for targeted  
117 profiling.

118

119 The **C8-pos** method measures polar and nonpolar lipids. Lipids were extracted from 10  $\mu$ L  
120 plasma using 190  $\mu$ L of isopropanol, separated using reversed phase C8 chromatography, and  
121 analyzed HRAM, full-scan MS in the positive ion mode. The **C18-neg** method measures free  
122 fatty acids, oxidized fatty acids and lipid mediators, bile acids, and metabolites of intermediate  
123 polarity; these metabolites were extracted from 30  $\mu$ L plasma using 90  $\mu$ L of methanol, then  
124 separated using reversed phase C18 chromatography, and analyzed using HRAM, full-scan MS  
125 in the negative ion mode. The **HILIC-pos** method measures amino acids, amino acid  
126 metabolites, acylcarnitines, dipeptides, and other cationic polar metabolites; these metabolites  
127 were extracted from 10  $\mu$ L plasma using 90  $\mu$ L of 25% methanol/75% acetonitrile, then  
128 separated using hydrophilic interaction liquid chromatography (HILIC), and analyzed using  
129 HRAM, full-scan MS in the positive ion mode. The **HILIC-neg** method measures sugars, organic  
130 acids, purines, pyrimidines, and other anionic polar metabolites; these metabolites were  
131 extracted from 30  $\mu$ L plasma using 120  $\mu$ L of methanol containing internal standards and  
132 analyzed using either HRAM, full-scan MS in the negative ion mode or targeted multiple  
133 reaction monitoring using the QTRAP 5500 triple quadrupole MS system.

134  
135 Raw data from Q Exactive series mass spectrometers were processed using TraceFinder  
136 software (Thermo Fisher Scientific) to detect and integrate as subset of identified metabolites  
137 and Progenesis QI software (v 2.0, Nonlinear Dynamics) to detect, de-isotope, and integrate  
138 peak areas from both identified and unknown metabolites. MultiQuant (SCIEX) was used to  
139 integrate peak areas of metabolites measured using the QTRAP 5500. Identities of metabolites  
140 were confirmed by matching measured retention times (RT) and mass-to-charge ratios (m/z) to  
141 authentic reference standards. Since reference standards are not available for all lipids,  
142 representative lipids from each lipid class were used to characterize RT and m/z ratio patterns.  
143 Lipid identities are reported at the level of lipid class, total acyl carbon content, and total double  
144 bond content since the LC-MS method does not discretely resolve all isomeric lipids from one

145 another. Unknown features (unnamed metabolites) were not used in these analyses.

146 Coefficients of variation (CVs) and missingness are reported in Supplemental Tables 1 & 2 for  
147 each metabolite.

148

149 **Statistical analysis.** Percent change in Homeostatic Model Assessment of Insulin Resistance  
150 (HOMA-IR) over the intervention time period is the outcome used to represent metabolic health  
151 for this study. HOMA-IR is calculated from clinically determined blood glucose and insulin levels  
152 as previously described.[10,11] Individuals were excluded if HOMA-IR percent change was  
153 implausible, i.e., greater than five standard deviations from the cohort mean (N=2 removed).  
154 Metabolites measured at baseline in blood plasma by LC-MS are in the form of the natural log of  
155 the MS peak's area under the curve (AUC). The primary study was association of baseline  
156 metabolites with percent change in HOMA-IR over the obesity intervention time period. The  
157 secondary study was of heterogeneity between cohorts in the primary study.

158

159 **Within cohort analysis.** Two statistical analyses were performed for this study within each of  
160 the three cohorts. 1) A univariate linear association model between percent change of HOMA-IR  
161 and baseline metabolite, in order to find metabolites that effect HOMA-IR. 2) The same model  
162 as before with the addition of covariates for age, sex, race, baseline clinical triglycerides, and  
163 percent change in weight over the follow-up time period in order to determine if the individual  
164 metabolite effects HOMA-IR independent of traditional clinical measures known to be  
165 associated with insulin resistance.

166

167 **Meta-analysis.** For both the primary univariate model and the full model, the three cohorts then  
168 were meta-analyzed together using an inverse-variance weighted random effects model  
169 implemented in R's meta library.[29] To account for the multiple tests, a false discovery rate  
170 (FDR) correction was applied to the random effects p-values from the meta-analysis of the three



171 cohorts.[30] A Cochran q-test of heterogeneity also was performed to find metabolites having  
172 different effects between the three cohorts.[31] Metabolites were filtered for only known  
173 metabolites with less than 25% missingness after meta-analysis (N=199 removed).

174

175 **Metabolite set analysis.** We used a variation of the Gene Set Enrichment Analysis (GSEA)  
176 method [32,33] to determine in an unbiased manner if any particular group of metabolites was  
177 overrepresented at the beginning or end of a sorted list of our 765 metabolite results. Lists of  
178 metabolite results were either sorted by z-score from the random effects meta-analysis (primary  
179 analysis) or by Cochran q-test statistic from the heterogeneity analysis (secondary analysis).  
180 The goal of GSEA is to determine whether the metabolites are randomly distributed throughout  
181 this sorted list or mainly found at the beginning or end by performing a random walk along the  
182 list and recording the maximum enrichment score (ES) along the way. Metabolite sets  
183 associated with the outcome will have positive or negative ES depending on the direction of  
184 effect; while metabolite sets unrelated to the outcome will have ES near zero. The 22 sets from  
185 HMDB's taxonomic sub-classification of metabolites were used, with only sets with at least five  
186 metabolites in our data were tested. P-values were determined by one million permutations and  
187 FDR multi-test correction.

188

189 **Results**

190

191 **Study Populations.** This study includes three intervention study cohorts: Weight Loss

192 Maintenance (WLM) cohort, Studies of Targeted Risk Reduction Interventions through Defined

193 Exercise in individuals with Pre-Diabetes (STRRIDE-PD), and Columbia Bariatric and Diabetes

194 (CBD) cohort. Table 1 describes the demographics of these three cohorts.

195

196 Table 1: Baseline Characteristics of the Study Populations

| Clinical Characteristics    | WLM        | STRRIDE-PD | CBD       |
|-----------------------------|------------|------------|-----------|
| N                           | 443        | 163        | 125       |
| Female (%)                  | 62%        | 63%        | 82%       |
| Race (% AA)                 | 37%        | 18%        | 50%       |
| Race (% EA)                 | 62%        | 78%        | 49%       |
| Age (years)                 | 56 ± 8.7   | 59 ± 7.5   | 42 ± 10   |
| Weight (kg)                 | 96 ± 16    | 86 ± 12    | 121 ± 22  |
| Weight Loss (kg)            | -8.5 ± 3.8 | -2.7 ± 4.0 | -35 ± 16  |
| BMI (kg/m <sup>2</sup> )    | 34 ± 4.7   | 30 ± 2.8   | 44 ± 5.8  |
| HOMA-IR                     | 2.4 ± 1.6  | 2.0 ± 1.5  | 9.6 ± 5.8 |
| HOMA-IR, Percent Change (%) | -16 ± 105  | -16 ± 42   | -71 ± 21  |
| Triglycerides (mg/dL)       | 127 ± 71   | 123 ± 64   | 158 ± 108 |
| Total Cholesterol (mg/dL)   | 185 ± 35   | 190 ± 32   | 187 ± 39  |
| HDL Cholesterol (mg/dL)     | 43 ± 14    | 46 ± 14    | 48 ± 12   |
| LDL Cholesterol (mg/dL)     | 110 ± 27   | 119 ± 27   | 108 ± 31  |

197

198 Unless otherwise stated, measures are at baseline timepoint. AA: African American. EA:  
199 European Ancestry. BMI: body mass index. HOMA-IR: Homeostatic Model Assessment of  
200 Insulin Resistance. HDL: high density lipoprotein cholesterol. LDL: low density lipoprotein  
201 cholesterol. Weight loss is measured over the follow-up period. Values are listed as mean  $\pm$   
202 standard deviation. “cm” is centimeters. “kg” is kilograms. “m” is meters. “mg” is milligrams. “dL”  
203 is deciliters. “%” is percent.

204

205 **Metabolomic profiling.** Four complementary liquid chromatography tandem mass  
206 spectrometry (LC-MS)-based methods were used to measure plasma lipids and polar  
207 metabolites. Figure 1 shows the Human Metabolome Database’s (HMDB’s)[34–37] superclass  
208 and subclass taxonomic identifications for the 765 known metabolites that were identified from  
209 all LC-MS methods in this study. Note that HMDB IDs ascribed to lipids are representative of  
210 one or more isomers sharing the same chemical formula.

211

212 Fig. 1: LC-MS Non-targeted Metabolite Classes

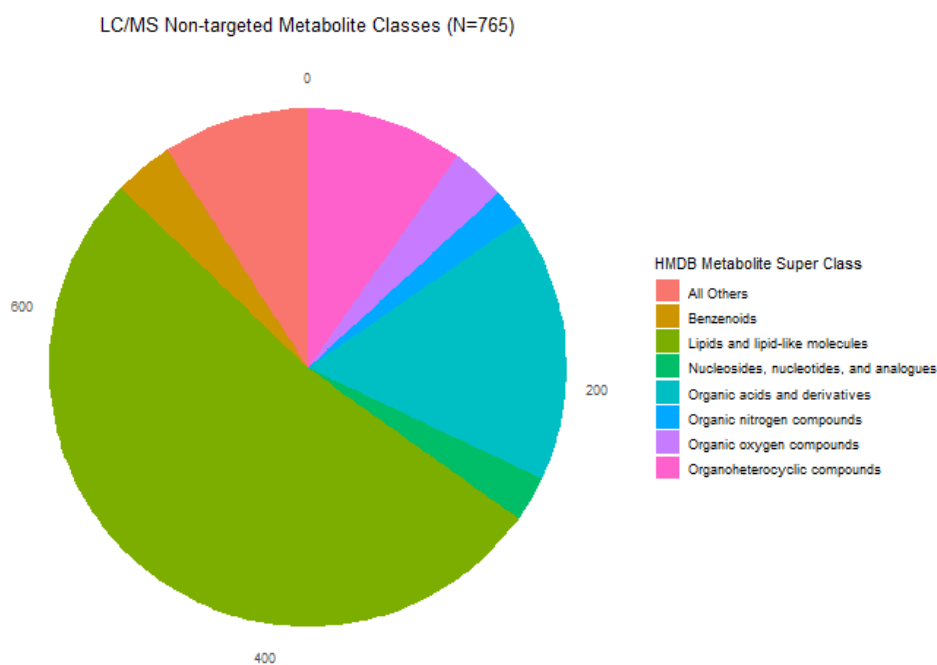

213

214 Pie graph of the Human Metabolome Database's (HMDB's) superclass taxonomic identifications  
215 for the 765 known metabolites from all LC-MS methods in this study. Nearly half of known  
216 metabolites were lipids or lipid-like molecules shown in forest green color.

217

218 **Association of baseline metabolites with percent change in HOMA-IR.** Meta-analysis of the  
219 univariate linear regression models in the three weight loss intervention cohorts identified 92  
220 baseline metabolites (Figure 2, Supplemental Table 1) associated with percent change in  
221 HOMA-IR after adjustment for multiple comparisons (FDR<5%). The top metabolites were  
222 dominated by triacylglycerol (TAG) and diacylglycerol (DAG) species (in light-orange and red,  
223 respectively, in Figure 2) and are listed in Table 2. As evidenced by the negative beta  
224 coefficient, higher baseline levels of metabolites at baseline were associated with greater  
225 reduction in HOMA-IR. For instance, the top result is C34:0 DAG with a FDR adjusted p-value of  
226 5.42e-6 and an effect size of -36.08% change in HOMA-IR over the intervention. To determine if  
227 an individual metabolite had an effect on HOMA-IR independent of traditional clinical measures  
228 known to be associated with insulin resistance, we looked for nominal significance in the full  
229 model. In the full model adjusted for age, sex, race, baseline triglycerides, and percent change  
230 in weight over the follow-up time period, 90 of the 92 significant metabolites retained the same  
231 direction of effect, 38 of these remained nominally associated with percent change in HOMA-IR  
232 (Supplemental Table 2). Table 2 compares the effect size estimates of the univariate model with  
233 the full model for the top 10 metabolites, demonstrating significance and consistency of  
234 magnitude and directionality of effect.

235

236 Table 2: Comparison of effect sizes between univariate and full models

| Metabolite | Univariate Model |     |          |        | Full Model |          |     |
|------------|------------------|-----|----------|--------|------------|----------|-----|
|            | Pvalue_FDR       | N   | Pvalue   | Beta   | Beta       | Pvalue   | N   |
| C34:0 DAG  | 5.42E-06         | 580 | 1.44E-08 | -36.08 | -25.03     | 8.90E-03 | 571 |
| C50:1 TAG  | 5.42E-06         | 677 | 1.92E-08 | -14.55 | -9.21      | 4.42E-03 | 661 |
| C30:0 DAG  | 1.19E-05         | 676 | 8.83E-08 | -9.02  | -5.26      | 1.67E-01 | 660 |
| C43:1 TAG  | 1.19E-05         | 662 | 9.07E-08 | -5.35  | -3.37      | 1.80E-01 | 646 |
| C48:0 TAG  | 1.19E-05         | 677 | 1.26E-07 | -7.80  | -4.79      | 2.32E-03 | 661 |
| C50:2 TAG  | 1.19E-05         | 677 | 1.16E-07 | -14.34 | -8.11      | 2.87E-02 | 661 |
| C56:1 TAG  | 1.23E-05         | 677 | 1.52E-07 | -8.31  | -6.23      | 5.36E-02 | 661 |
| C51:2 TAG  | 1.81E-05         | 677 | 2.56E-07 | -17.08 | -11.22     | 1.71E-03 | 661 |
| C45:2 TAG  | 2.91E-05         | 677 | 4.63E-07 | -7.89  | -4.53      | 2.51E-02 | 661 |
| C46:1 TAG  | 3.06E-05         | 677 | 5.40E-07 | -7.09  | -3.69      | 3.82E-02 | 661 |

237

238

239

240

241

242

243

244

245

246

247

248

249

Comparison of univariate model individual metabolite analysis (the primary analysis) to the full model conditional analyses where traditional clinical measures of age, sex, race, baseline clinical triglycerides, and percent change in weight over the follow-up time period were added to the model. The lack of major changes in effect sizes between the two models indicates the individual metabolites identified in the primary analysis provide additional clinical value over the traditional clinical measures. “Metabolite” is the common name for the metabolite. “N” is the number of individuals in the meta-analysis model. “Pvalue” is the random-effects p-value for the model. “Pvalue\_FDR” is the primary p-value after FDR multi-test correction. “Beta” is the random-effects effect size estimate for the model. Pvalues are colored green if < 0.05 and Betas and colored blue to red for being high or low, respectively.

Fig. 2: Meta-analysis of the Univariate Model

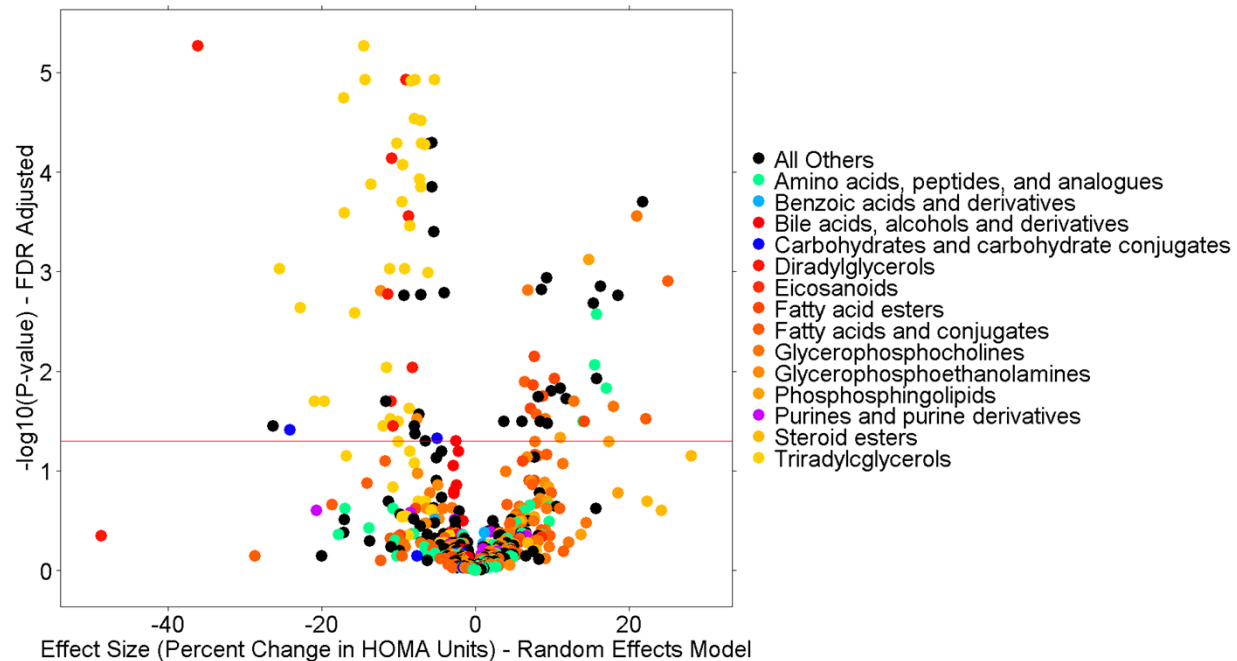

250 Effect Size (Percent Change in HOMA Units) - Random Effects Model

251 Volcano plot of the main analysis results from meta-analysis of the three cohorts for the 765

252 known metabolites from all LC-MS methods in this study. The x-axis is the random-effects

253 effect-size estimate in percent change of HOMA-IR units (e.g., “-40” indicates a 40% drop in

254 HOMA-IR over the intervention time period). Each dot is a metabolite colored by the Human

255 Metabolome Database’s (HMDB’s) subclass taxonomic identification. The y-axis is the –

256  $\log_{10}(\text{P-value})$  from the random effects meta-analysis of the three cohorts in this study after

257 FDR correction.

258

259 **Metabolite set analysis to identify enriched biological pathways.** We used metabolite set

260 analysis to determine in an unbiased manner if any particular group of metabolites was

261 overrepresented within the HMDB’s taxonomic sub-classification of metabolites. Figure 3 shows

262 the enrichment plots for the top five sub-classification of metabolites most associated with

263 increased in insulin resistance followed by the top five sub-classification of metabolites most

264 associated with reduction in insulin resistance. TAGs (FDR adjusted  $p=2.3e-5$ ) and DAGs (FDR

265 adjusted  $p=1.6e-4$ ) were the most significant sub-classifications associated with reduction in

266 insulin resistance over the intervention period in all 3 cohorts after FDR correction for the 22  
 267 sub-classifications tested. In fact, both TAGs and DAGs are associated with reduction in insulin  
 268 resistance over the intervention period in this regard. The “Glycerophosphocholines” (FDR  
 269 adjusted  $p=3.8e-4$ ), “Fatty acid esters” (FDR adjusted  $p=1.3e-3$ ), and “Phosphosphingolipids”  
 270 (FDR adjusted  $p=1.1e-2$ ) sub-classifications were also significantly associated with insulin  
 271 resistance after FDR multi-test correction; however, they were associated with increased insulin  
 272 resistance over the intervention period. Supplemental Table 3 contains results from all tested  
 273 HMDB sub-classifications.

274

275 Fig. 3: Metabolite Set Analysis of Univariate Model Meta-analysis

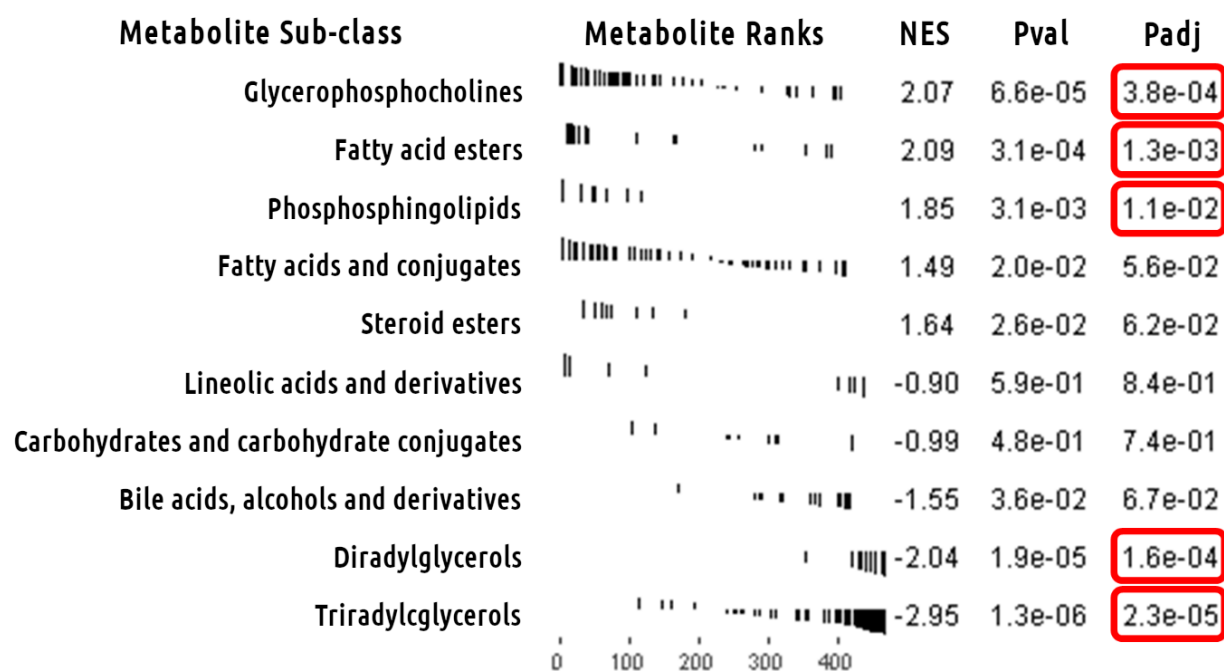

276

277 Main metabolite set analysis results for Human Metabolome Database’s (HMDB’s) subclass  
 278 taxonomic identification of metabolites. Enrichment plots for the top 5 HMDB subclasses  
 279 associated with increased insulin resistance followed by the top 5 HMDB subclasses associated  
 280 with reduction in insulin resistance. The x-axis is the metabolome sorted by meta-analysis z-  
 281 score. The y-axis has a black line for each hit in the *a priori* defined set of metabolites with

282 length equal to the meta-analysis z-score. Triacylglycerols stand out as most significant overall  
283 HMDB subclass and most significantly associated with reduction in insulin resistance. “NES” is  
284 normalized enrichment score. “Pval” is the p-value for the test. “Padj” is the same p-value after  
285 FDR multi-test correction.

286

287 **Metabolites showing heterogeneity of effect between different weight loss interventions.**

288 In analyses designed to determine which metabolites at baseline associate with heterogeneity in  
289 percent change in HOMA-IR between different weight loss intervention types, we performed a  
290 Cochran q-test of heterogeneity, with a linear correction for the co-variables of age, sex, race,  
291 baseline clinical triglycerides, and change in weight over the intervention time period. This type  
292 of analysis is designed to find individual metabolites that can be added to a traditional clinical  
293 model to aid in determining which of available obesity intervention a patient should be assigned  
294 to. These analyses identified 50 metabolites (Supplemental Table 2) with nominally significant  
295 p-values ( $p < 0.05$ ) for heterogeneity by weight loss intervention cohort. Table 3 shows results for  
296 the top 10 metabolites from these analyses. The top metabolite, for example, was N6,N6-  
297 dimethyllysine (meta-analysis  $p = 1.14e-4$ ), which demonstrated an estimated effect size in  
298 percent change of HOMA-IR units of 14.63% in the CBD surgical cohort vs -10.57% in the  
299 STRRIDE-PD exercise cohort and -2.04% in the WLM behavioral cohort, suggesting that  
300 participants with higher baseline levels of this metabolite have a greater improvement of insulin  
301 sensitivity in response to exercise than to surgical weight loss. Figure 4 shows a volcano plot of  
302 these results. Unlike the findings in the primary analysis, no major HMDB classification  
303 dominates the top results.

304

305 Table 3: Top 10 Metabolites Heterogeneous in Effect among Interventions from Full Model



| Metabolite            | N   | Beta  | Q_Pvalue | HMDB Sub-class                           |
|-----------------------|-----|-------|----------|------------------------------------------|
| N6,N6-dimethyllysine  | 662 | 1.41  | 1.14E-04 |                                          |
| N-acetyltryptophan    | 662 | -5.30 | 7.13E-04 | Amino acids, peptides, and analogues     |
| proline               | 662 | -2.57 | 9.40E-04 | Amino acids, peptides, and analogues     |
| gentisate             | 619 | -5.51 | 2.25E-03 | Benzoic acids and derivatives            |
| ADMA                  | 662 | 5.53  | 2.28E-03 | Amino acids, peptides, and analogues     |
| 2-aminoheptanoate     | 643 | -0.96 | 2.30E-03 |                                          |
| phenylacetylglutamine | 662 | -1.54 | 2.79E-03 | Amino acids, peptides, and analogues     |
| tryptophan            | 662 | -7.11 | 5.70E-03 | Indolyl carboxylic acids and derivatives |
| C52:0 TAG             | 661 | -8.87 | 6.56E-03 | Triradylglycerols                        |
| NMMA                  | 662 | 1.56  | 6.71E-03 | Amino acids, peptides, and analogues     |

306  
 307 Top 10 metabolites from the heterogeneity analysis of percent change in HOMA-IR. HOMA-IR is  
 308 Homeostatic Model Assessment of Insulin Resistance. Beta is the random-effects effect-size  
 309 estimate in percent change of HOMA-IR units (e.g. "-40" indicates a 40% drop in HOMA-IR  
 310 over the intervention time period). Q\_Pvalue is the p-value from the Cochran Q-test of  
 311 heterogeneity. Subclass is the Human Metabolome Database's (HMDB's) subclass taxonomic  
 312 identification for the metabolite.

313

314 Fig. 4: Heterogeneity Volcano Plot from Full Model Meta-analysis

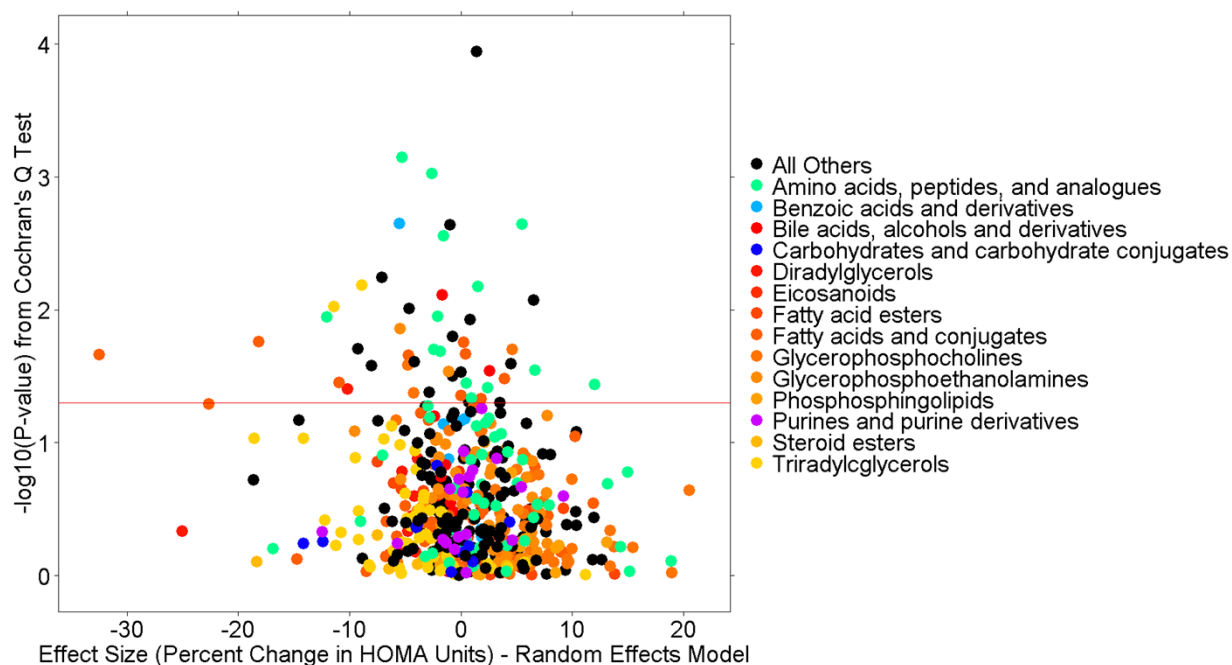

315

316 Volcano plot of the heterogeneity analysis results from meta-analysis of the three cohorts for the  
317 765 known metabolites from all LC-MS methods in this study. The x-axis is the random-effects  
318 effect-size estimate in percent change of HOMA-IR units (e.g., “-40” indicates a 40% drop in  
319 HOMA-IR over the intervention time period). Each dot is a metabolite colored by the Human  
320 Metabolome Database’s (HMDB’s) subclass taxonomic identification. The y-axis is the –  
321  $\log_{10}(\text{P-value})$  from the Cochran Q-test of heterogeneity.

322

323 **Metabolite set analysis for metabolites associated with heterogeneity of effect among**

324 **weight loss interventions.** Metabolite set analysis was again performed, this time for the set of  
325 metabolites associated with heterogeneity in response to intervention using the Cochran q-test  
326 statistic. Figure 5 shows the enrichment plots for the top five most heterogeneous followed by  
327 the five least heterogeneous sub-classification of metabolites. After FDR multi-test correction for  
328 the 22 sub-classifications tested, only the metabolite set “Amino acids, peptides, and  
329 analogues” was significant (FDR adjusted  $p=4.7e-3$ ). This result is not clear from single  
330 metabolite analysis and therefore shows the power of metabolite set analyses like this one.  
331 Supplemental Table 4 contains results from all tested HMDB sub-classifications.

332

333 Fig. 5: Heterogeneity Metabolite Set Analysis of Full Model Meta-analysis

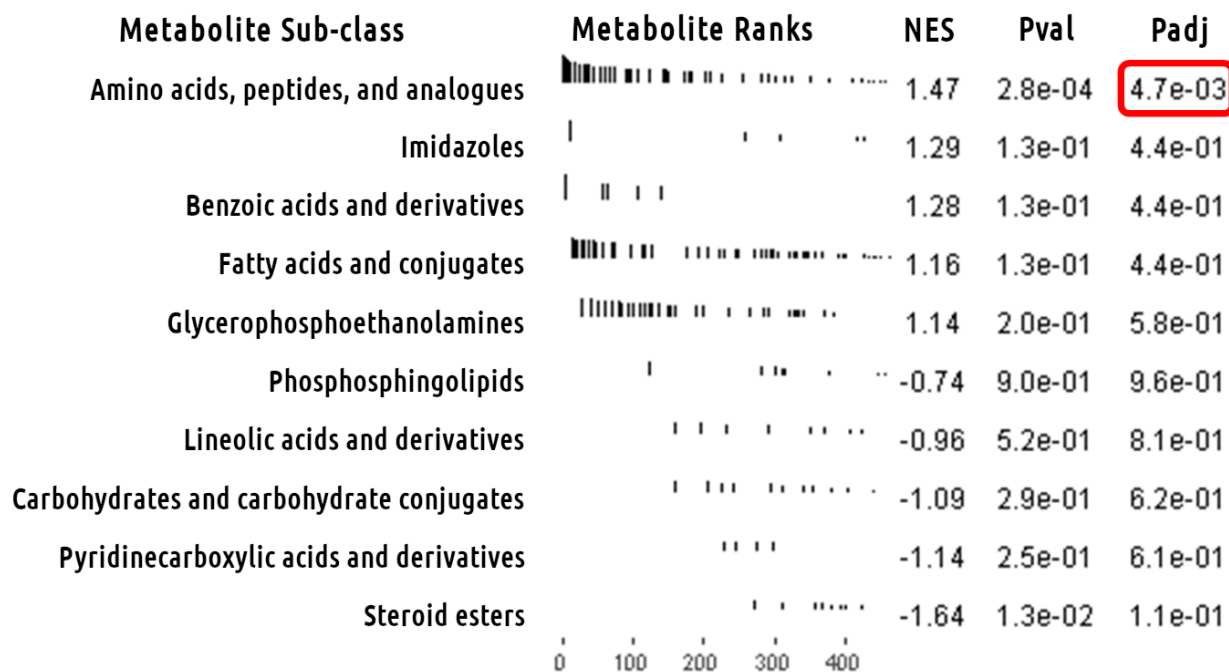

334

335 Heterogeneity metabolite set analysis results for Human Metabolome Database's (HMDB's)

336 subclass taxonomic identification of metabolites. Enrichment plots for top 5 most heterogeneous

337 and top 5 least heterogeneous HMDB subclasses between the three cohorts in this study. The

338 x-axis is the metabolome sorted by heterogeneity Q-score. The y-axis has a black line for each

339 hit in the *a priori* defined set of metabolites with length equal to the heterogeneity Q-score. The

340 amino acids, peptides, and analogues subclass stand out as most significantly heterogeneous

341 HMDB subclass. "NES" is normalized enrichment score. "Pval" is the p-value for the test. "Padj"

342 is the same p-value after FDR multi-test correction.

343

## 344 Discussion

345 In the first-of-its-kind study using a comprehensive metabolomics platform in three large  
346 cohorts, we have identified metabolites that, measured at baseline, were associated with  
347 improvements in insulin resistance, an important metabolic health measure, across behavioral,  
348 exercise and surgical weight loss interventions in individuals with obesity. Specifically, we found  
349 that higher baseline levels of complex triglyceride lipid species, triacylglycerols and  
350 diacylglycerols, are associated with a more salutatory metabolic response across weight loss  
351 interventions. Perhaps more importantly, we identify metabolites that were associated with  
352 heterogeneity in improvement in insulin resistance depending on the type of weight loss  
353 intervention. Specifically, we found 14 amino acids, peptides, and analogues, measured at  
354 baseline, that were associated with differential response to weight loss intervention (N-  
355 acetyltryptophan, proline, ADMA, phenylacetylglutamine, NMMA, phenylacetylglutamine,  
356 tyrosine, hydroxyproline, N-alpha-acetylarginine, N6-acetyllysine, betaine, histidine, 2-  
357 aminooctanoate, and lysine; Supplemental Table 2). These metabolites have great potential in  
358 precision medicine for overweight/obese individuals, serving as baseline biomarkers that add to  
359 clinical models of metabolic response to weight loss interventions, and to help guide a  
360 personalized approach to weight loss intervention.

361  
362 Most dietary fat is TAGs, which need to be broken down before absorption in the gut, then  
363 reassembled into circulating low and high-density lipoproteins (LDL/HDL). High levels of TAGs  
364 have been associated with atherosclerosis and stroke.[38] DAGs are precursors to TAGs that  
365 have themselves be associated with immune-independent mechanisms of developing insulin  
366 resistance and/or T2DM in muscle and liver tissues.[39,40]

367

368 Previous work has indicated that individual TAGs with lower carbon number (44-52 vs 54-60  
369 carbons) and separately lower double-bond content (0-3 vs 4-12 double-bonds) are associated  
370 with a higher likelihood of developing T2DM (higher carbon number and higher double-bond  
371 content were neutral in effect towards likelihood of developing T2DM).[41] In the current study,  
372 we find individual TAGs with carbon numbers between 50 and 55 and double-bond count  
373 between two and three were associated with reduction in insulin resistance over an intervention  
374 for obesity time period. Other TAG species were neutral in effect toward insulin resistance or  
375 slight reduction in insulin resistance (Supplemental Figure 1 and 2). This may mean low carbon  
376 number, saturated TAGs that indicated one may develop T2DM in the previous study[41] may  
377 also indicate an obesity intervention will be less effective.

378

379 Of note, using a much less comprehensive metabolomic platform, we have previously observed  
380 branched chain amino acids (BCAA) to be associated with insulin resistance and that higher  
381 baseline levels are associated with a greater decrease in insulin resistance[42,43]. In this study,  
382 we find amino acid analogues (including BCAAs) to be heterogeneous among our cohorts. In  
383 the case of the individual BCAAs (valine, leucine, isoleucine), they show no association in our  
384 CBD surgical cohort, while being positively associated with reduction in insulin resistance in  
385 WLM and STRRIDE-PD. The low standard error in the CBD cohort causes the overall inverse-  
386 variance weighted meta-analysis of the three cohorts to be non-significant. It is know that gut  
387 bacteria can alter the bioavailability of BCAAs.[44] This may indicate that the microbiome is  
388 important to consider during exercise/behavioral obesity interventions and less so during  
389 surgical interventions perhaps due to antibiotic usage related to having a surgery.

390

391 Another item of note is although our top hit of N6,N6-dimethyllysine is relatively unknown in the  
392 literature, our second most significantly heterogeneous amino acid analogues, N-  
393 acetyltryptophan, demonstrated the same pattern as the BCAAs; it is also been shown to be

394 associated with host-gut microbiota interactions in both blood and urine bio-specimens.[45–47]  
395 Namely that the amino acid tryptophan is modified into N-acetyltryptophan by the gut microbiota  
396 and then absorbed into the host human. This adds to our earlier statement that the microbiome  
397 is important to consider during exercise/behavioral obesity interventions and less so during  
398 surgical interventions. We would point to antibiotic usage related to having surgery “resetting”  
399 the microbiome after the baseline sample (used in this study to predict outcomes) has been  
400 collected as a plausible reason for this.

401  
402 While this is the first study to compare a large number of metabolites measured at baseline  
403 across diverse weight loss interventions, the study has a few limitations. The included cohorts  
404 are prospective, but are observational and therefore causation of metabolite pathways on insulin  
405 resistance cannot be determined, although we note that these associations remained significant  
406 after adjustment for amount of weight loss and other important comorbidities. Further, these  
407 results highlight important metabolites that might be used in a prospective randomized  
408 biomarker-guided clinical trial of assignment to different weight loss interventions. Our study  
409 also primarily involves individuals of European and/or African ancestry and therefore has  
410 unclear implications for other ancestries.

411  
412 We believe this work demonstrates the validity and utility of evaluating the blood metabolome  
413 when determining the proper obesity intervention for a patient in a precision medicine context.  
414 Our work demonstrates the potential value of measuring individual TAGs and the differentiating  
415 ability of amino acid analogues in deciding the best obesity intervention for an individual. Future  
416 biomarker-guided intervention studies are necessary to determine clinical utility.

417

## 418 Acknowledgments

419 NAB and SHS are funded by American Heart Association Strategically Focused Research  
420 Network 17SFRN33670990 and 17SFRN33700155. LCK, CBC, AAD, and SHS are funded by  
421 NHLBI 5R01HL127009. REG is funded by NIDDK 5R01DK081572.

422

## 423 Author contributions

424 NAB: Data curation, Formal analysis, Investigation, Methodology, Writing

425 LCK: Data curation

426 CBC: Methodology

427 AAD: Methodology

428 REG: Methodology

429 NJP: Data curation

430 BL: Conceptualization, Data curation

431 LPS: Conceptualization, Data curation

432 CBN: Data curation, Methodology

433 WEK: Conceptualization, Data curation

434 SHS: Conceptualization, Funding acquisition, Project administration, Resources, Supervision,  
435 Writing

436

## 437 Conflict of interest statement

438 NAB, LCK, CBC, AAD, REG, BL and LPS have no conflicts. NJP has grants to institution from

439 Amgen and Regeneron/Sanofi; and performs consulting for Esperion. CBN, WEK and SHS

440 have an unlicensed patent on a related research finding (US10317414B2). The other authors

441 have declared that no conflict of interest exists.

442



## 443 References

444

- 445 1. Allison DB, Fontaine KR, Manson JE, Stevens J, VanItallie TB. Annual deaths attributable  
446 to obesity in the United States. *JAMA*. 1999;282: 1530–1538.  
447 doi:10.1001/jama.282.16.1530
- 448 2. Fontaine KR, Redden DT, Wang C, Westfall AO, Allison DB. Years of life lost due to  
449 obesity. *JAMA*. 2003;289: 187–193. doi:10.1001/jama.289.2.187
- 450 3. Hu FB, Willett WC, Li T, Stampfer MJ, Colditz GA, Manson JE. Adiposity as compared with  
451 physical activity in predicting mortality among women. *N Engl J Med*. 2004;351: 2694–  
452 2703. doi:10.1056/NEJMoa042135
- 453 4. Calle EE, Thun MJ, Petrelli JM, Rodriguez C, Heath CW. Body-mass index and mortality in  
454 a prospective cohort of U.S. adults. *N Engl J Med*. 1999;341: 1097–1105.  
455 doi:10.1056/NEJM1999100734111501
- 456 5. Ogden CL, Carroll MD, Kit BK, Flegal KM. Prevalence of obesity in the United States,  
457 2009-2010. *NCHS Data Brief*. 2012; 1–8.
- 458 6. Samaranyake NR, Ong KL, Leung RYH, Cheung BMY. Management of obesity in the  
459 National Health and Nutrition Examination Survey (NHANES), 2007-2008. *Ann Epidemiol*.  
460 2012;22: 349–353. doi:10.1016/j.annepidem.2012.01.001
- 461 7. Tuomilehto J, Lindström J, Eriksson JG, Valle TT, Hämäläinen H, Ilanne-Parikka P, et al.  
462 Prevention of type 2 diabetes mellitus by changes in lifestyle among subjects with impaired  
463 glucose tolerance. *N Engl J Med*. 2001;344: 1343–1350.  
464 doi:10.1056/NEJM200105033441801
- 465 8. Jensen MD, Ryan DH, Apovian CM, Ard JD, Comuzzie AG, Donato KA, et al. 2013  
466 AHA/ACC/TOS Guideline for the Management of Overweight and Obesity in Adults: A  
467 Report of the American College of Cardiology/American Heart Association Task Force on  
468 Practice Guidelines and The Obesity Society. *Journal of the American College of  
469 Cardiology*. 2014;63: 2985–3023. doi:10.1016/j.jacc.2013.11.004
- 470 9. Shah SH, Crosslin DR, Haynes CS, Nelson S, Turer CB, Stevens RD, et al. Branched-  
471 chain amino acid levels are associated with improvement in insulin resistance with weight  
472 loss. *Diabetologia*. 2012;55: 321–330. doi:10.1007/s00125-011-2356-5
- 473 10. Svetkey LP, Stevens VJ, Brantley PJ, Appel LJ, Hollis JF, Loria CM, et al. Comparison of  
474 Strategies for Sustaining Weight Loss: The Weight Loss Maintenance Randomized  
475 Controlled Trial. *JAMA*. 2008;299: 1139–1148. doi:10.1001/jama.299.10.1139
- 476 11. Appel LJ, Moore TJ, Obarzanek E, Vollmer WM, Svetkey LP, Sacks FM, et al. A clinical  
477 trial of the effects of dietary patterns on blood pressure. DASH Collaborative Research  
478 Group. *N Engl J Med*. 1997;336: 1117–1124. doi:10.1056/NEJM199704173361601

- 479 12. Miller ER, Appel LJ, Risby TH. Effect of dietary patterns on measures of lipid peroxidation:  
480 results from a randomized clinical trial. *Circulation*. 1998;98: 2390–2395.  
481 doi:10.1161/01.cir.98.22.2390
- 482 13. Appel LJ, Miller ER, Jee SH, Stolzenberg-Solomon R, Lin PH, Erlinger T, et al. Effect of  
483 dietary patterns on serum homocysteine: results of a randomized, controlled feeding study.  
484 *Circulation*. 2000;102: 852–857. doi:10.1161/01.cir.102.8.852
- 485 14. Svetkey LP, Simons-Morton D, Vollmer WM, Appel LJ, Conlin PR, Ryan DH, et al. Effects  
486 of dietary patterns on blood pressure: subgroup analysis of the Dietary Approaches to Stop  
487 Hypertension (DASH) randomized clinical trial. *Arch Intern Med*. 1999;159: 285–293.
- 488 15. Obarzanek E, Sacks FM, Vollmer WM, Bray GA, Miller ER, Lin PH, et al. Effects on blood  
489 lipids of a blood pressure-lowering diet: the Dietary Approaches to Stop Hypertension  
490 (DASH) Trial. *Am J Clin Nutr*. 2001;74: 80–89. doi:10.1093/ajcn/74.1.80
- 491 16. Sacks FM, Svetkey LP, Vollmer WM, Appel LJ, Bray GA, Harsha D, et al. Effects on blood  
492 pressure of reduced dietary sodium and the Dietary Approaches to Stop Hypertension  
493 (DASH) diet. DASH-Sodium Collaborative Research Group. *N Engl J Med*. 2001;344: 3–  
494 10. doi:10.1056/NEJM200101043440101
- 495 17. Slentz CA, Bateman LA, Willis LH, Granville EO, Piner LW, Samsa GP, et al. Effects of  
496 exercise training alone vs a combined exercise and nutritional lifestyle intervention on  
497 glucose homeostasis in prediabetic individuals: a randomised controlled trial. *Diabetologia*.  
498 2016;59: 2088–2098. doi:10.1007/s00125-016-4051-z
- 499 18. Sarzynski Mark A., Ruiz-Ramie Jonathan J., Barber Jacob L., Slentz Cris A., Apolzan John  
500 W., McGarrah Robert W., et al. Effects of Increasing Exercise Intensity and Dose on  
501 Multiple Measures of HDL (High-Density Lipoprotein) Function. *Arteriosclerosis,  
502 Thrombosis, and Vascular Biology*. 2018;38: 943–952. doi:10.1161/ATVBAHA.117.310307
- 503 19. Laferrère B, Heshka S, Wang K, Khan Y, McGinty J, Teixeira J, et al. Incretin levels and  
504 effect are markedly enhanced 1 month after Roux-en-Y gastric bypass surgery in obese  
505 patients with type 2 diabetes. *Diabetes Care*. 2007;30: 1709–1716. doi:10.2337/dc06-1549
- 506 20. Laferrère B, Reilly D, Arias S, Swerdlow N, Gorroochurn P, Bawa B, et al. Differential  
507 metabolic impact of gastric bypass surgery versus dietary intervention in obese diabetic  
508 subjects despite identical weight loss. *Sci Transl Med*. 2011;3: 80re2.  
509 doi:10.1126/scitranslmed.3002043
- 510 21. Bose M, Machineni S, Oliván B, Teixeira J, McGinty JJ, Bawa B, et al. Superior appetite  
511 hormone profile after equivalent weight loss by gastric bypass compared to gastric  
512 banding. *Obesity (Silver Spring)*. 2010;18: 1085–1091. doi:10.1038/oby.2009.473
- 513 22. Dutia R, Brakoniecki K, Bunker P, Paultre F, Homel P, Carpentier AC, et al. Limited  
514 recovery of  $\beta$ -cell function after gastric bypass despite clinical diabetes remission.  
515 *Diabetes*. 2014;63: 1214–1223. doi:10.2337/db13-1176
- 516 23. Stano S, Alam F, Wu L, Dutia R, Ng S-N, Sala M, et al. Effect of meal size and texture on  
517 gastric pouch emptying and glucagon-like peptide 1 after gastric bypass surgery. *Surg  
518 Obes Relat Dis*. 2017;13: 1975–1983. doi:10.1016/j.soard.2017.09.004

- 519 24. Wang TJ, Ngo D, Psychogios N, Dejam A, Larson MG, Vasan RS, et al. 2-Amino adipic  
520 acid is a biomarker for diabetes risk. *J Clin Invest*. 2013;123: 4309–4317.  
521 doi:10.1172/JCI64801
- 522 25. Mascanfroni ID, Takenaka MC, Yeste A, Patel B, Wu Y, Kenison JE, et al. Metabolic  
523 control of type 1 regulatory T cell differentiation by AHR and HIF1- $\alpha$ . *Nat Med*. 2015;21:  
524 638–646. doi:10.1038/nm.3868
- 525 26. Esko T, Hirschhorn JN, Feldman HA, Hsu Y-HH, Deik AA, Clish CB, et al. Metabolomic  
526 profiles as reliable biomarkers of dietary composition. *Am J Clin Nutr*. 2017;105: 547–554.  
527 doi:10.3945/ajcn.116.144428
- 528 27. Paynter NP, Balasubramanian R, Giulianini F, Wang DD, Tinker LF, Gopal S, et al.  
529 Metabolic Predictors of Incident Coronary Heart Disease in Women. *Circulation*. 2018;137:  
530 841–853. doi:10.1161/CIRCULATIONAHA.117.029468
- 531 28. Lloyd-Price J, Arze C, Ananthakrishnan AN, Schirmer M, Avila-Pacheco J, Poon TW, et al.  
532 Multi-omics of the gut microbial ecosystem in inflammatory bowel diseases. *Nature*.  
533 2019;569: 655–662. doi:10.1038/s41586-019-1237-9
- 534 29. Balduzzi S, Rücker G, Schwarzer G. How to perform a meta-analysis with R: a practical  
535 tutorial. *Evidence-Based Mental Health*. 2019;22: 153–160. doi:10.1136/ebmental-2019-  
536 300117
- 537 30. Benjamini Y, Hochberg Y. Controlling the False Discovery Rate: A Practical and Powerful  
538 Approach to Multiple Testing. *Journal of the Royal Statistical Society Series B*  
539 (Methodological). 1995;57: 289–300.
- 540 31. Cochran WG. THE COMPARISON OF PERCENTAGES IN MATCHED SAMPLES.  
541 *Biometrika*. 1950;37: 256–266. doi:10.1093/biomet/37.3-4.256
- 542 32. Mootha VK, Lindgren CM, Eriksson K-F, Subramanian A, Sihag S, Lehar J, et al. PGC-1 $\alpha$ -  
543 responsive genes involved in oxidative phosphorylation are coordinately downregulated in  
544 human diabetes. *Nat Genet*. 2003;34: 267–273. doi:10.1038/ng1180
- 545 33. Subramanian A, Tamayo P, Mootha VK, Mukherjee S, Ebert BL, Gillette MA, et al. Gene  
546 set enrichment analysis: a knowledge-based approach for interpreting genome-wide  
547 expression profiles. *Proc Natl Acad Sci USA*. 2005;102: 15545–15550.  
548 doi:10.1073/pnas.0506580102
- 549 34. Wishart DS, Tzur D, Knox C, Eisner R, Guo AC, Young N, et al. HMDB: the Human  
550 Metabolome Database. *Nucleic Acids Res*. 2007;35: D521-526. doi:10.1093/nar/gkl923
- 551 35. Wishart DS, Knox C, Guo AC, Eisner R, Young N, Gautam B, et al. HMDB: a  
552 knowledgebase for the human metabolome. *Nucleic Acids Res*. 2009;37: D603-610.  
553 doi:10.1093/nar/gkn810
- 554 36. Wishart DS, Feunang YD, Marcu A, Guo AC, Liang K, Vázquez-Fresno R, et al. HMDB  
555 4.0: the human metabolome database for 2018. *Nucleic Acids Res*. 2018;46: D608–D617.  
556 doi:10.1093/nar/gkx1089

- 557 37. Wishart DS, Jewison T, Guo AC, Wilson M, Knox C, Liu Y, et al. HMDB 3.0--The Human  
558 Metabolome Database in 2013. *Nucleic Acids Res.* 2013;41: D801-807.  
559 doi:10.1093/nar/gks1065
- 560 38. Lisak M, Demarin V, Trkanjec Z, Basić-Kes V. Hypertriglyceridemia as a possible  
561 independent risk factor for stroke. *Acta Clin Croat.* 2013;52: 458–463.
- 562 39. Erion DM, Shulman GI. Diacylglycerol-mediated insulin resistance. *Nature Medicine.*  
563 2010;16: 400–402. doi:10.1038/nm0410-400
- 564 40. Petersen MC, Madiraju AK, Gassaway BM, Marcel M, Nasiri AR, Butrico G, et al. Insulin  
565 receptor Thr<sup>1160</sup> phosphorylation mediates lipid-induced hepatic insulin resistance. *J Clin*  
566 *Invest.* 2016;126: 4361–4371. doi:10.1172/JCI86013
- 567 41. Rhee EP, Cheng S, Larson MG, Walford GA, Lewis GD, McCabe E, et al. Lipid profiling  
568 identifies a triacylglycerol signature of insulin resistance and improves diabetes prediction  
569 in humans. *J Clin Invest.* 2011;121: 1402–1411. doi:10.1172/JCI44442
- 570 42. Newgard CB, An J, Bain JR, Muehlbauer MJ, Stevens RD, Lien LF, et al. A Branched-  
571 Chain Amino Acid-Related Metabolic Signature that Differentiates Obese and Lean  
572 Humans and Contributes to Insulin Resistance. *Cell Metabolism.* 2009;9: 311–326.  
573 doi:10.1016/j.cmet.2009.02.002
- 574 43. Newgard CB. Interplay between Lipids and Branched-Chain Amino Acids in Development  
575 of Insulin Resistance. *Cell Metabolism.* 2012;15: 606–614. doi:10.1016/j.cmet.2012.01.024
- 576 44. Neis EPJG, Dejong CHC, Rensen SS. The role of microbial amino acid metabolism in host  
577 metabolism. *Nutrients.* 2015;7: 2930–2946. doi:10.3390/nu7042930
- 578 45. Chen MX, Wang S-Y, Kuo C-H, Tsai I-L. Metabolome analysis for investigating host-gut  
579 microbiota interactions. *Journal of the Formosan Medical Association.* 2019;118: S10–S22.  
580 doi:10.1016/j.jfma.2018.09.007
- 581 46. Wikoff WR, Anfora AT, Liu J, Schultz PG, Lesley SA, Peters EC, et al. Metabolomics  
582 analysis reveals large effects of gut microflora on mammalian blood metabolites. *PNAS.*  
583 2009;106: 3698–3703. doi:10.1073/pnas.0812874106
- 584 47. Pavlova T, Vidova V, Bienertova-Vasku J, Janku P, Almasi M, Klanova J, et al. Urinary  
585 intermediates of tryptophan as indicators of the gut microbial metabolism. *Analytica*  
586 *Chimica Acta.* 2017;987: 72–80. doi:10.1016/j.aca.2017.08.022
- 587
- 588

## 589 Supporting information captions

### 590 **Supplemental Table 1: HOMA-IR PC vs logMetabolite - Univariate Model - Analysis**

591 Includes all meta-analysis results for univariate model after filtering (see methods). Metabolite:  
592 metabolite name, N\_Samples: number of samples, N\_Studies: number of cohorts that had data  
593 for the metabolite (up to 3), Beta\_Fixed: effect size from fixed effects meta-analysis, SE\_Fixed:  
594 standard error from fixed effects meta-analysis, Zvalue\_Fixed: z-score from fixed effects meta-  
595 analysis, Pvalue\_Fixed: p-value from fixed effects meta-analysis, Beta\_Random: effect size  
596 from random effects meta-analysis, SE\_Random: standard error from random effects meta-  
597 analysis, Zvalue\_Random: z-score from random effects meta-analysis, Pvalue\_Random: p-  
598 value from from random effects meta-analysis, Q: Cochran q-test statistic, Q\_df: Cochran q-test  
599 degrees of freedom, Q\_Pvalue: Cochran q-test p-value, Tau2: tau-squared between-study  
600 variance, H: H-statistic, I2: I-squared statistic, WLM\_GP1\_Beta: Effect size within WLM,  
601 WLM\_GP1\_SE: standard error within WLM, WLM\_GP1\_Num: number of samples within WLM,  
602 StrridePD\_Beta: effect size within STRRIDE-PD, StrridePD\_SE: standard error within  
603 STRRIDE-PD, StrridePD\_Num: Number of samples within STRRIDE-PD, CBD\_Beta: effect size  
604 within CBD, CBD\_SE: standard error within CBD, CBD\_Num: number of samples within CBD,  
605 Method: LC-MS method used to measure metabolite, HMDB.ID...representative.ID.: HMDB ID  
606 for metabolite, super\_class: HMDB metabolite taxonomy super class, class: HMDB metabolite  
607 taxonomy class, sub\_class: HMDB metabolite taxonomy sub class, missingness: metabolite  
608 missingness rate, zeroness: metabolite rate of being zero value, CV: metabolite coefficient of  
609 variation, Pvalue\_Adj\_Fixed: FDR adjusted p-value from fixed effects meta-analysis,  
610 Pvalue\_Adj\_Random: FDR adjusted p-value from random effects meta-analysis.

611

612

613

614 **Supplemental Table 2: HOMA-IR PC vs logMetabolite - Full Model - Analysis**

615 Includes all meta-analysis results for full model after filtering (see methods). Same columns as  
616 Supplemental Table 1.

617

618 **Supplemental Table 3: GSEA HOMA-IR PC Taxonomy Subclass Results**

619 Includes all Metabolite Set Analysis of univariate model meta-analysis results for the 22  
620 metabolite sets. Pathway: name of metabolite set, pval: p-value from GSEA test, padj: FDR  
621 adjusted p-value, ES: enrichment score, NES: normalized enrichment score, nMoreExtreme:  
622 number of 1 million permutation that were more extreme than data, size: number of metabolites  
623 in metabolite set.

624

625 **Supplemental Table 4: GSEA HOMA-IR PC Heterogeneity Taxonomy Subclass Results**

626 Includes all Heterogeneity Metabolite Set Analysis of full model meta-analysis results for the 22  
627 metabolite sets. Same columns as Supplemental Table 3.

628

629 **Supplemental Figure 1: HOMA-IR PC logMetabolite Analysis - Univariate Model -**

630 **Triradylclycerols - Carbon Downsloping Plot - Sig**

631 Plot of TAG metabolite effect size from random effects meta-analysis of univariate model vs  
632 number of carbon atom in the TAG.

633

634 **Supplemental Figure 2: HOMA-IR PC logMetabolite Analysis - Univariate Model -**

635 **Triradylclycerols - Bond Downsloping Plot - Sig**

636 Plot of TAG metabolite effect size from random effects meta-analysis of univariate model vs  
637 number of double bonds in the TAG.

638
